# Supplementary material for: Rational design of 3D N-doped carbon nanosheet framework encapsulated ultrafine ZnO nanocrystals as superior performance anode materials in lithium ion batteries
Source: Royal Society of Chemistry journal article supplement (doi:10.1039/c9ta08377d), 2019-01-01
Supplement: c9ta08377d1.pdf [file c9ta08377d1.pdf]

## Supporting Information

### **Rational Design of 3D N-doped Carbon Nanosheet Framework Encapsulated Ultrafine ZnO Nanocrystals as Superior Performance Anode Materials in Lithium Ion Batteries**

Jianding Li<sup>a</sup>, Huajun Zhao<sup>a</sup>, Meimei Wang<sup>b</sup>, Yongyang Zhu<sup>c</sup>, Bo Li<sup>a</sup>, Xueqing Yu<sup>a</sup>,  
Jincheng Xu<sup>a</sup>, Yajun Cheng<sup>b</sup>, Liuzhang Ouyang<sup>c,\*</sup>, and Huaiyu Shao<sup>a,\*</sup>

a. Joint Key Laboratory of the Ministry of Education, Institute of Applied Physics and  
Materials Engineering (IAPME), University of Macau, Macau SAR, China

b. Ningbo Institute of Materials Technology & Engineering, Chinese Academy of  
Sciences, 1219 Zhongguan West Road, Ningbo, 315201, Zhejiang Province, China

c. School of Materials Science and Engineering, Guangdong Provincial Key Laboratory  
of Advanced Energy Storage Materials, South China University of Technology,  
Guangzhou, 510641, China

Corresponding Author

\*E-mail: [meouyang@scut.edu.cn](mailto:meouyang@scut.edu.cn)

\*E-mail: [hshao@um.edu.mo](mailto:hshao@um.edu.mo)

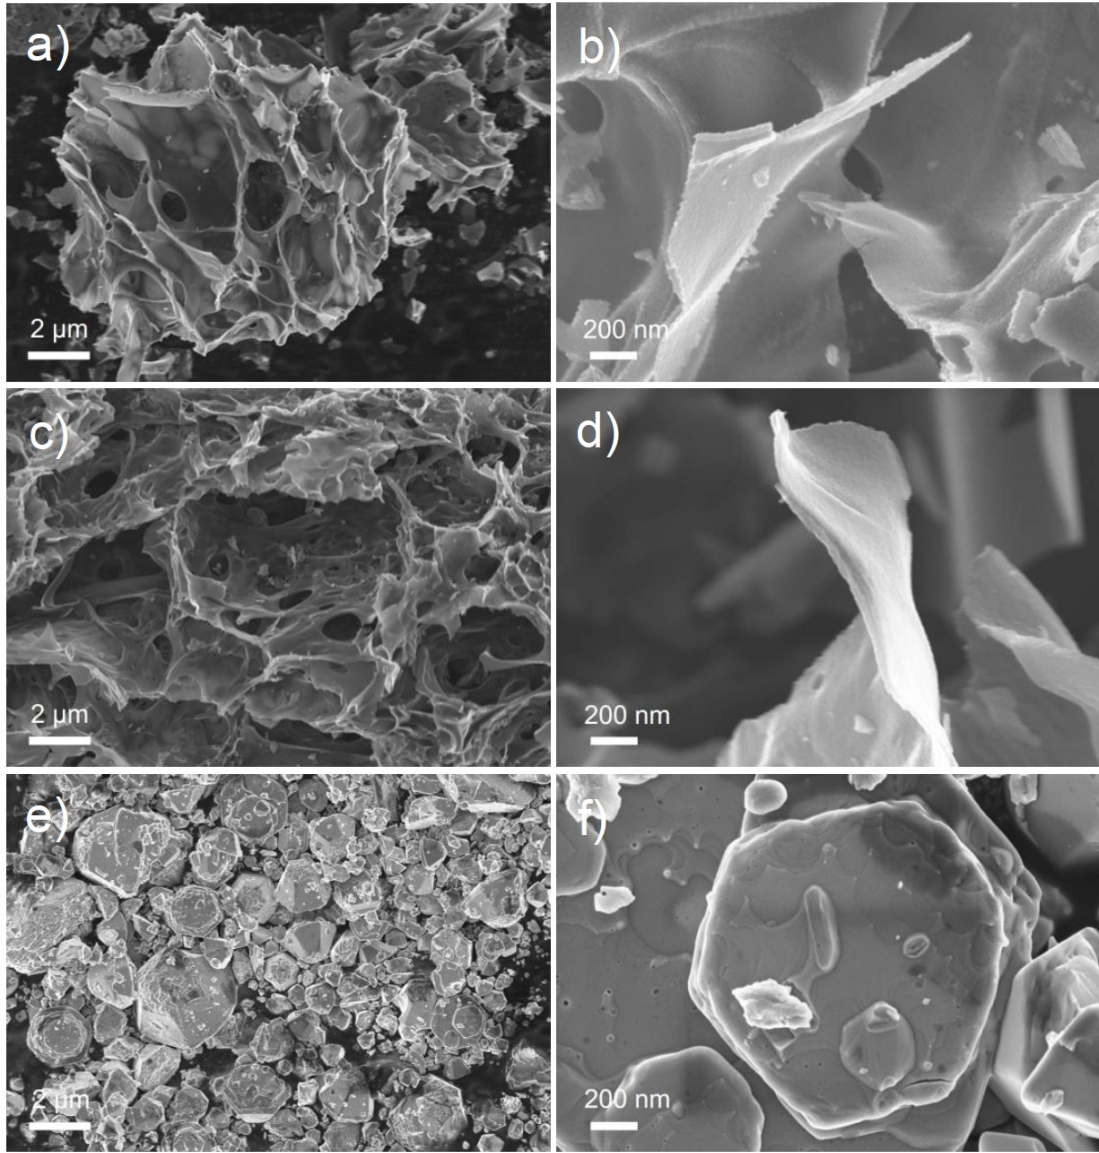

**Fig. S1.** SEM images of ZnO-NCNF-600 (a, b), ZnO-NCNF-800 (c, d) and pure ZnO (e, f).

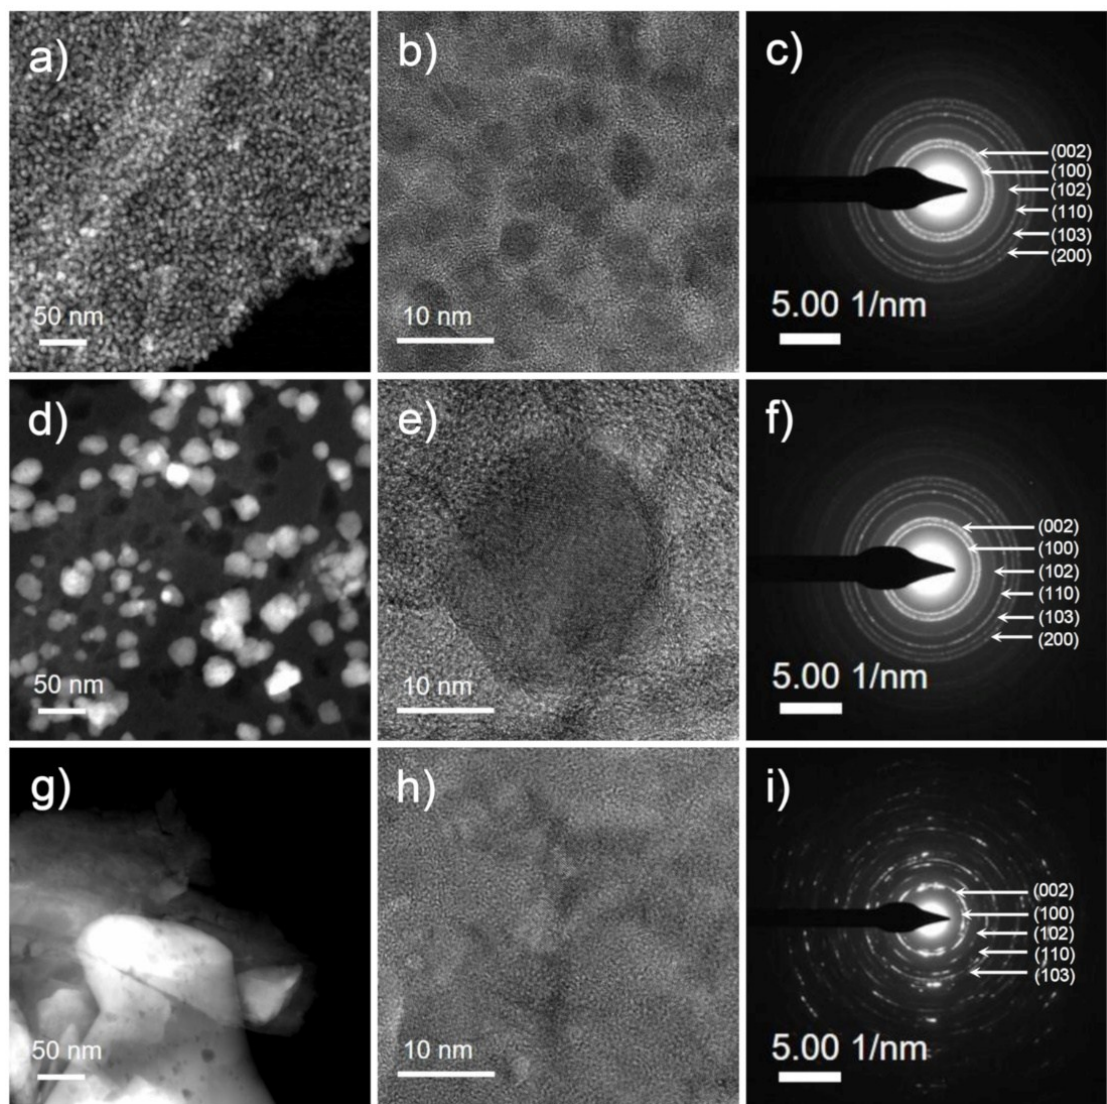

**Fig. S2.** HADDF STEM images, HRTEM images and selected area electron diffraction of ZnO-NCNF-600 (a-c), ZnO-NCNF-800 (d-f) and ZnO (g-i), respectively.

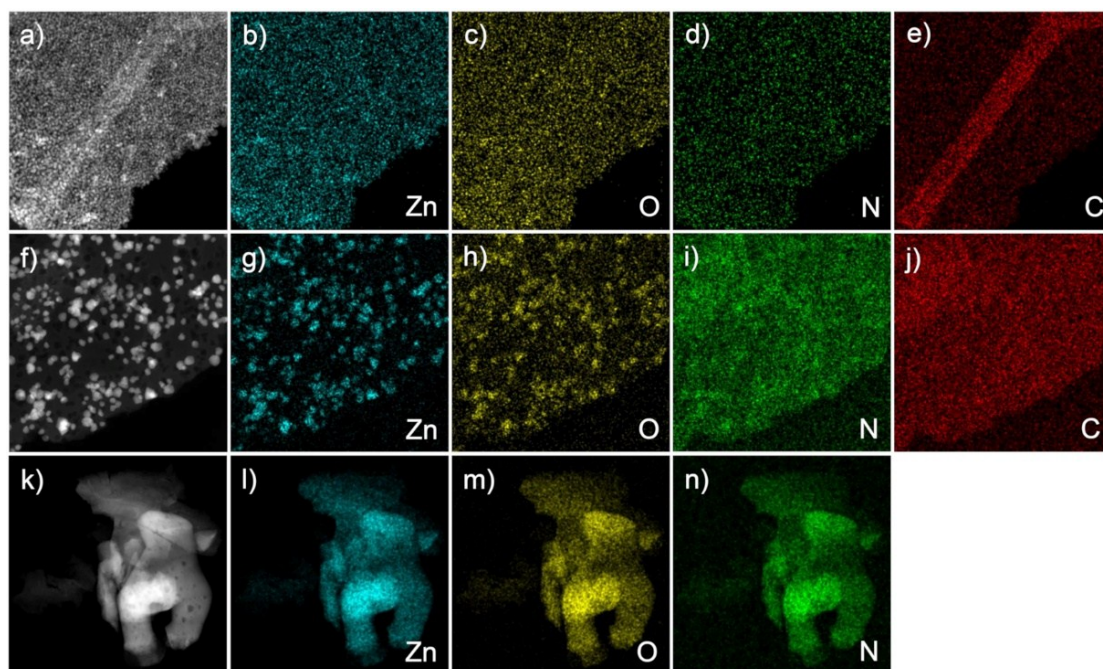

**Fig. S3.** HADF STEM images and corresponding element mappings of ZnO-NCNF-600 (a-e), ZnO-NCNF-800 (f-j) and ZnO (k-n).

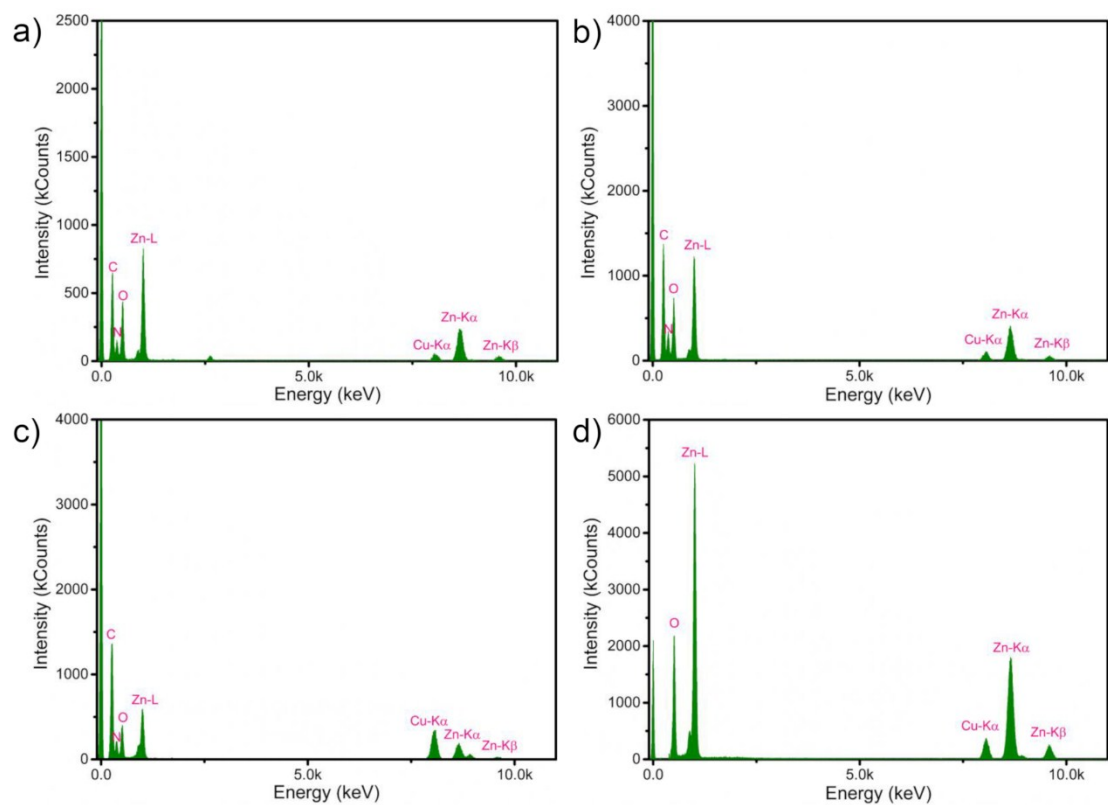

**Fig. S4.** EDS spectra of ZnO-NCNF-600 (a), ZnO-NCNF-700 (b), ZnO-NCNF-800 (c) and pure ZnO (d).



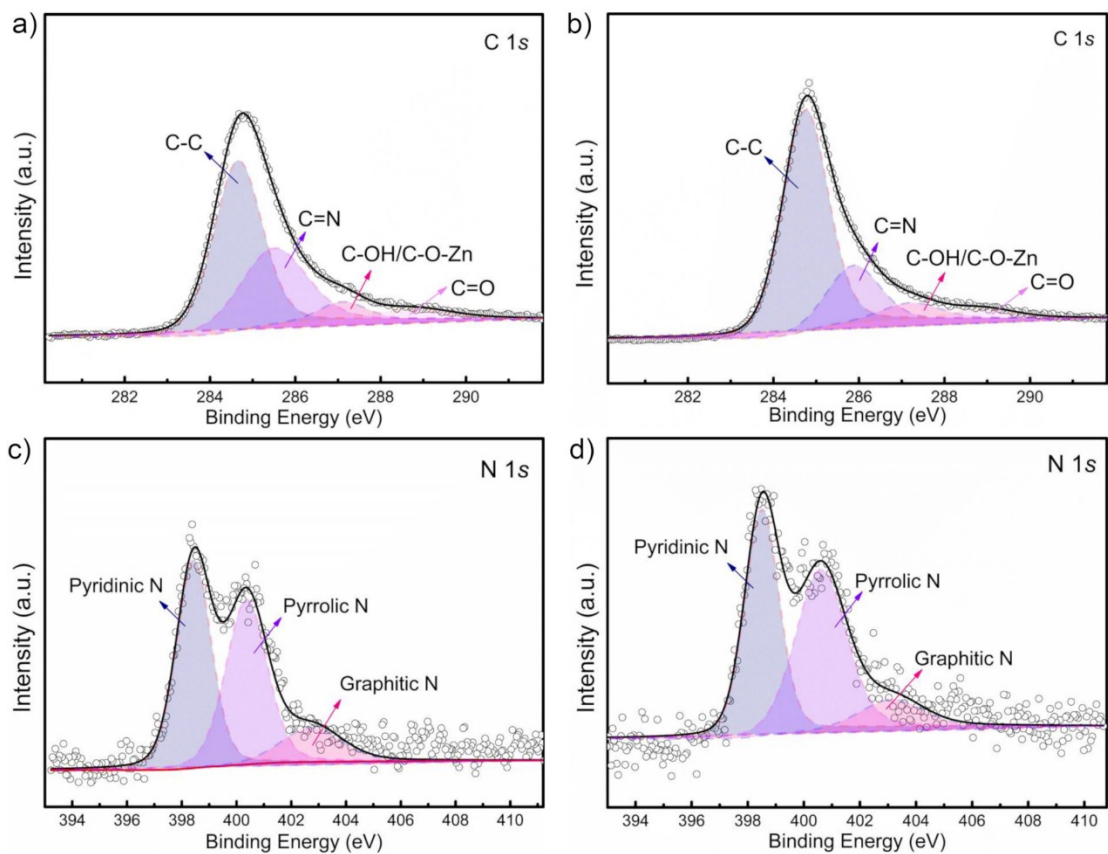

**Fig. S5.** The deconvoluted C1s (a) and N 1s (c) peaks for ZnO-NCNF-600 as well as the C1s (b) and N 1s (d) peaks for ZnO-NCNF-800 composite, respectively.

**Table S1.** Zn 2*p*, O1*s* binding energy and chemical composition of ZnO-NCNF composite and ZnO determined from the XPS results.

| Sample           | Zn<br>2 <i>p</i> <sub>1/2</sub><br>(eV) | Zn<br>2 <i>p</i> <sub>3/2</sub><br>(eV) | O 1 <i>s</i><br>Peak one | O 1 <i>s</i><br>Peak two | C<br>(at.%) | N<br>(at.%) | O<br>(at.%) | Zn<br>(at.%) |
|------------------|-----------------------------------------|-----------------------------------------|--------------------------|--------------------------|-------------|-------------|-------------|--------------|
| ZnO              | 1044.0                                  | 1020.8                                  | 529.8                    | 531.3                    | -           | 2.94        | 33.78       | 25.67        |
| ZnO-NCNF-<br>600 | 1044.7                                  | 1021.5                                  | 530.6                    | 532.4                    | 64.51       | 7.65        | 20.55       | 7.29         |
| ZnO-NCNF-<br>700 | 1044.8                                  | 1021.7                                  | 530.7                    | 532.5                    | 61.42       | 7.33        | 26.06       | 5.19         |
| ZnO-NCNF-<br>800 | 1044.9                                  | 1021.8                                  | 530.8                    | 532.7                    | 74.73       | 7.24        | 14.36       | 3.67         |

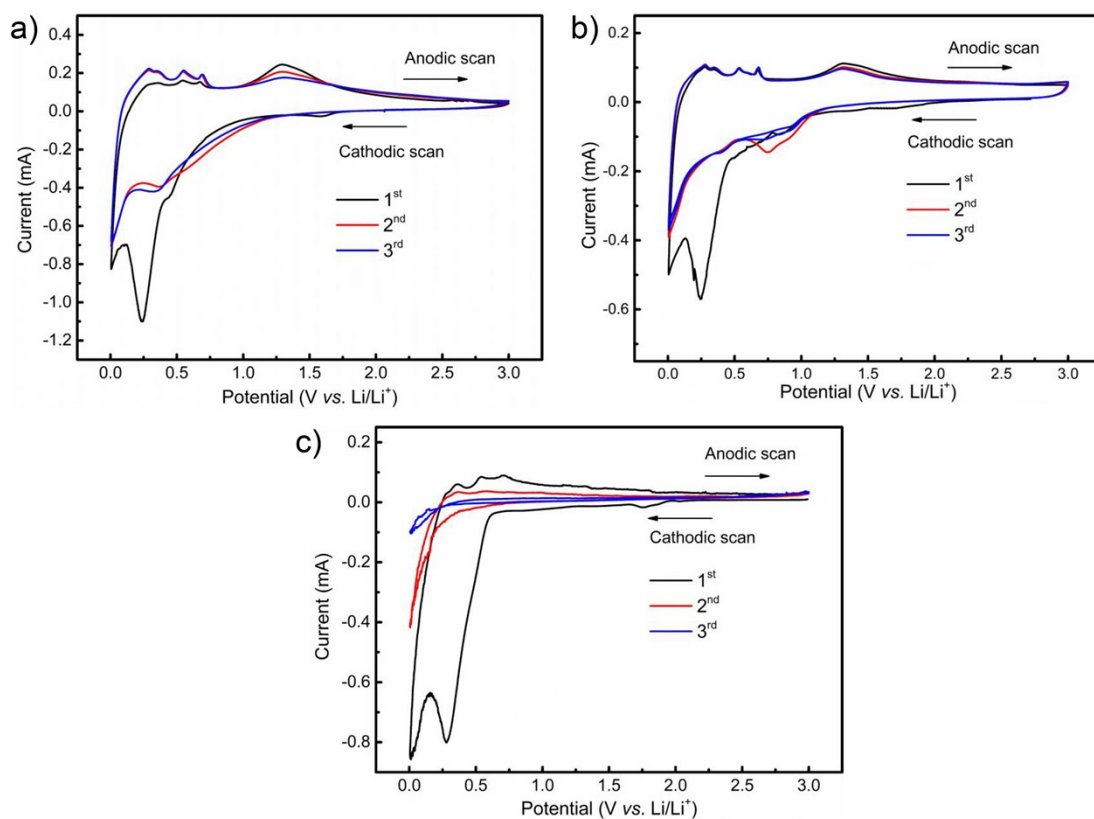

**Fig. S6.** Cyclic voltammety curves of ZnO-NCNF-600 (a), ZnO-NCNF-800 (b) and pure ZnO (c) for the initial three cycles at the scan rate of 0.1 mV s<sup>-1</sup>.



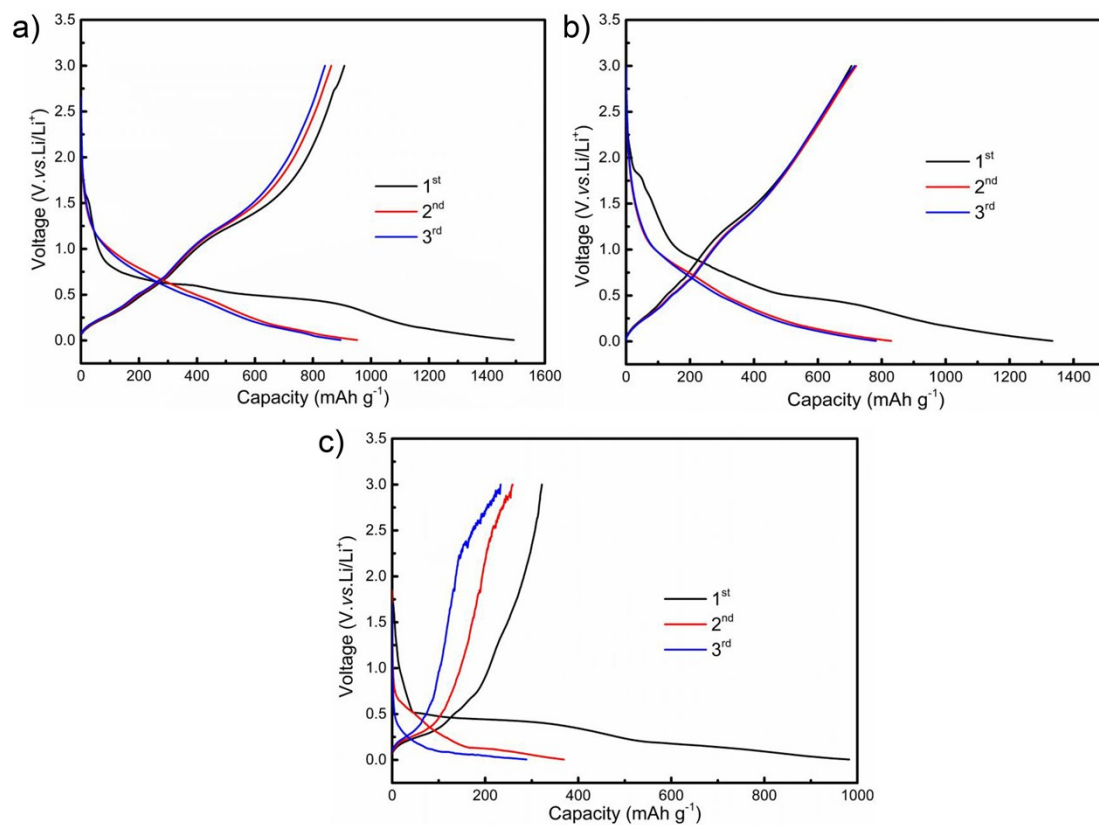

**Fig. S7.** Charge-discharge curves of ZnO-NCNF-600 (a), ZnO-NCNF-800 (b) and pure ZnO (c) electrode materials for the initial three cycles.

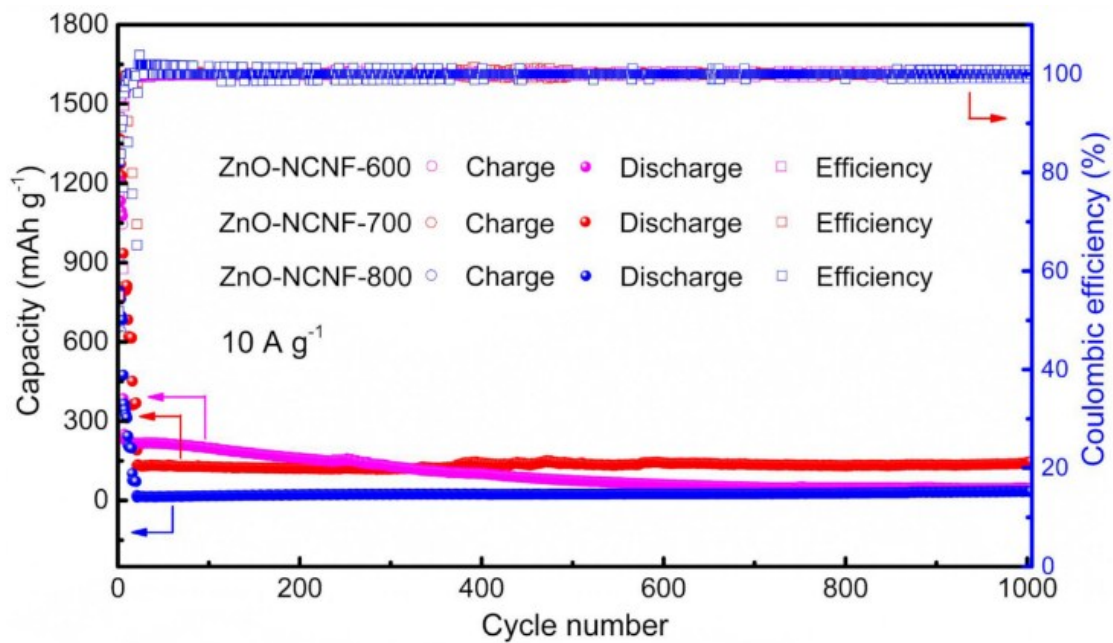

**Fig. S8.** Cyclic performance of ZnO-NCNF-600, ZnO-NCNF-700 and ZnO-NCNF-800 composites at a current density of 10000 mA g<sup>-1</sup> for 1000 cycles.

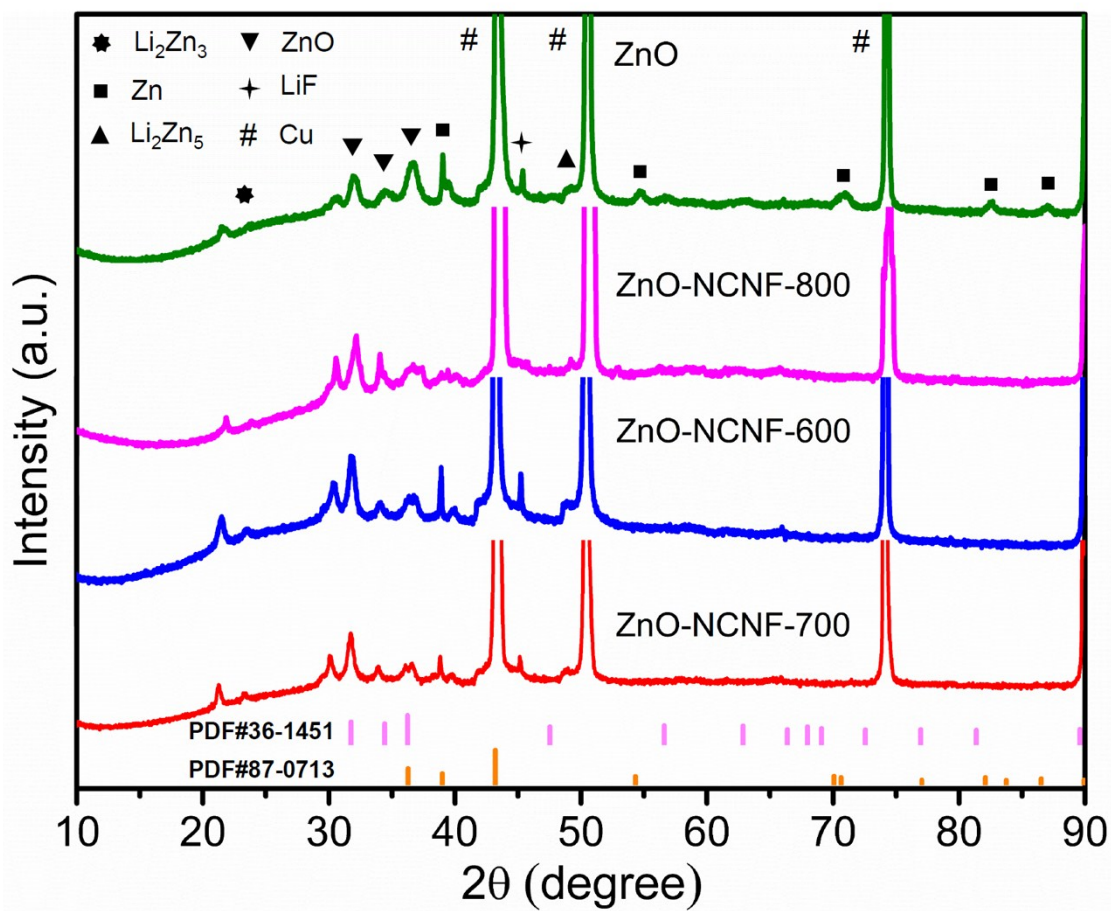

**Fig. S9.** XRD patterns of ZnO-NCNF-600, ZnO-NCNF-700, ZnO-NCNF-800 composites and pure ZnO after 750 cycles at  $1000 \text{ mA g}^{-1}$ .

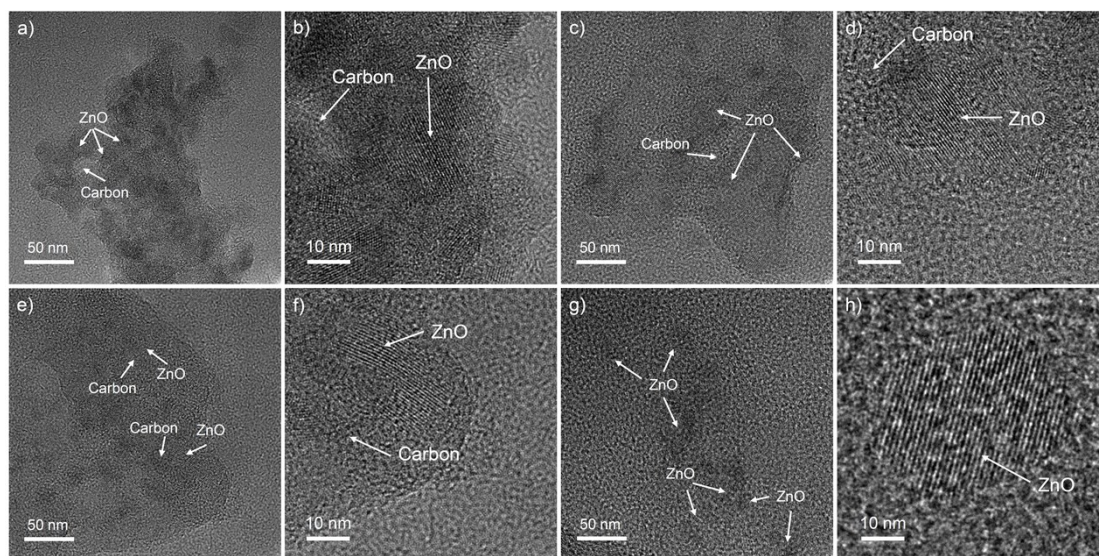

**Fig. S10.** TEM images of ZnO-NCNF-600 (a-b), ZnO-NCNF-700 (c-d), ZnO-NCNF-800 (e-f) composites and pure ZnO (g-h) electrode materials after 750 cycles at  $1000 \text{ mA g}^{-1}$ .

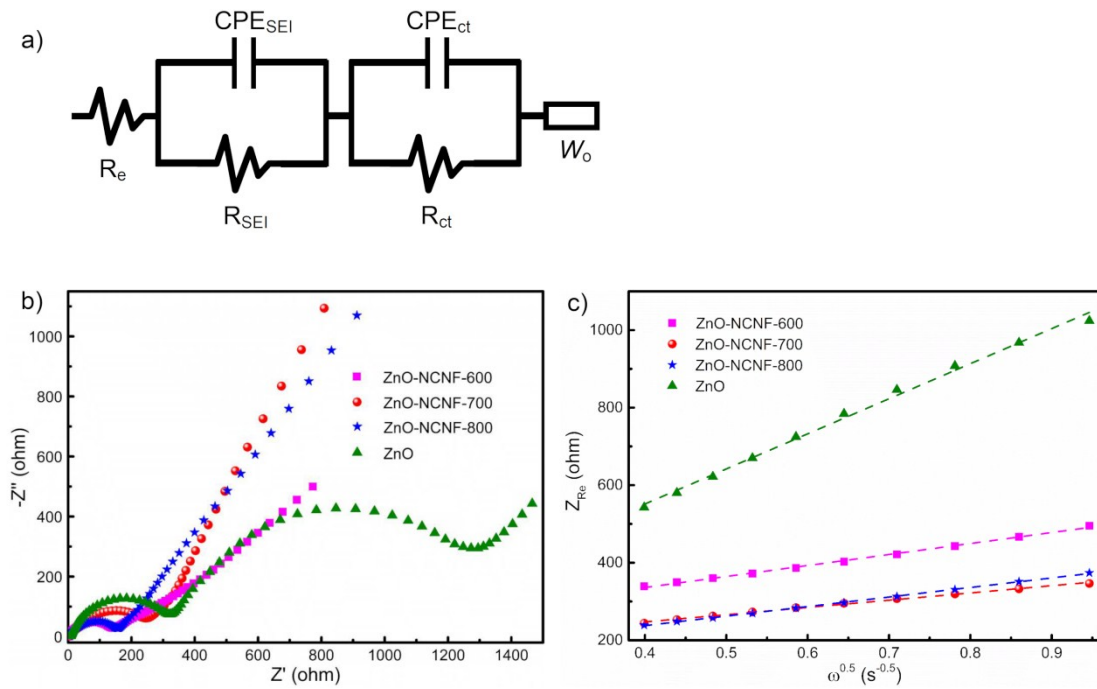

**Fig. S11.** (a) Equivalent circuit used to fit the impedance spectra and electrochemical impedance spectra of ZnO-NCNF-600, ZnO-NCNF-700, ZnO-NCNF-800 composites and pure ZnO after the first charge-discharge cycle (b). The relationship between the real resistance and the lower frequencies (c).

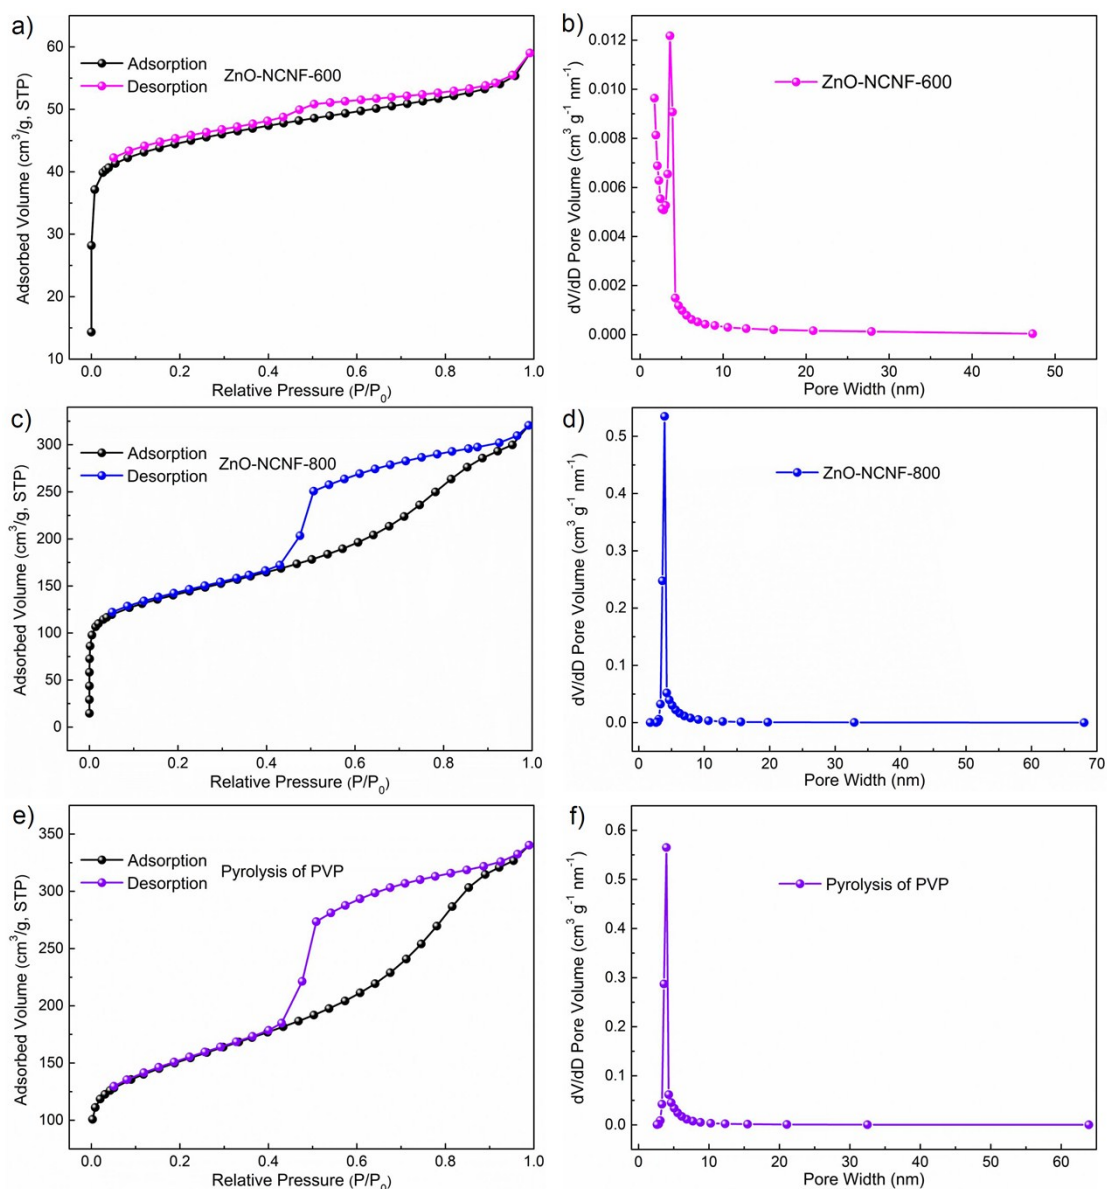

**Fig. S12.** Nitrogen adsorption-desorption isotherms and pore size distributions for ZnO-NCNF-600 (a-b), ZnO-NCNF-800 (c-d) and the pyrolysis of PVP (e-f).

The nitrogen adsorption-desorption isotherms and the pore size curves of ZnO-NCNF-600, ZnO-NCNF-800 and the annealed PVP are showed in **Fig. S12**. When compared with the ZnO-NCNF-600 ( $139.4 \text{ m}^2 \text{ g}^{-1}$ ), the lower specific surface area of ZnO-NCNF-700 ( $129.8 \text{ m}^2 \text{ g}^{-1}$ ) may be due to the decrease of carbon species. At this temperature, the obtained carbonaceous material deoxidizes ZnO and later evaporates forming mainly  $\text{CO}_2$  and  $\text{CO}$ , thus reducing the carbon content. In addition, the much higher specific area of ZnO-NCNF-800 ( $467.1 \text{ m}^2 \text{ g}^{-1}$ ) could be attributed to the vaporization of zinc oxide, leading to amounts of mesoporous in the composite (**Fig. S12d**).



**Table S2.** Comparison of lithium storage capabilities of ZnO-based anodes reported recently.

| Materials                               | Current density (mA g <sup>-1</sup> ) | Cycle number | Capacity (mAh g <sup>-1</sup> ) | Reference |
|-----------------------------------------|---------------------------------------|--------------|---------------------------------|-----------|
| ZnO-NCNF                                | 500                                   | 1000         | 770                             | This work |
|                                         | 1000                                  | 750          | 572                             |           |
|                                         | 10000                                 | 1000         | 148                             |           |
| Carbon/ZnO nanorod array                | 740                                   | 30           | 360                             | 1         |
| ZnO-loaded/porous carbon composites     | 100                                   | 100          | 653.7                           | 2         |
| ZnO encapsulated in 3D carbon framework | 100                                   | 200          | 850                             | 3         |
| ZnO–CB nanocomposite                    | 100                                   | 500          | 769                             | 4         |
| ZnO-NMPCS                               | 200                                   | 100          | 1059                            | 5         |
|                                         | 5000                                  | 1800         | 425                             |           |
| Carbon-coated ZNTs                      | 100                                   | 100          | 410                             | 6         |
| ZnO/carbon CNF                          | 100                                   | 100          | 818                             | 7         |
| ZnO@ZnO QDs/C NR Arrays                 | 500                                   | 100          | 699                             | 8         |
| Three-dimensional carbon/ZnO            | 2000                                  | 700          | 260                             | 9         |
| Peapod-like ZnO@C                       | 200                                   | 200          | 565                             | 10        |
| ZnO/3DOM-mC                             | 97.8                                  | 100          | 973.3                           | 11        |
| Graphite coated-ZnO                     | 1000                                  | 100          | 600                             | 12        |
| ZnO/C hierarchical porous nanorods      | 978                                   | 1500         | 623.94                          | 13        |
| ZnO@OMIL                                | 500                                   | 100          | 620                             | 14        |
|                                         | 1000                                  | 1400         | 420                             |           |
| Amorphous ZnO QDs/MPCBs                 | 1000                                  | 400          | 510                             | 15        |
| ZnO QD/Graphene                         | 1000                                  | 100          | 400                             | 16        |
| ZnO-QDs@CMS                             | 1000                                  | 350          | 565                             | 17        |
| ZnO-VAGNs                               | 350                                   | 250          | 450                             | 18        |
| ZnO/Cu/CNFs                             | 500                                   | 50           | 618                             | 19        |
|                                         | 1000                                  | 50           | 493                             |           |

**Table S3.** The impedance results of the ZnO and ZnO-NCNF-700 electrode materials at various cycles.

| ZnO               | R <sub>SEI</sub><br>(Ω) | R <sub>ct</sub><br>(Ω) | σ <sub>ω</sub><br>(Ω cm <sup>2</sup> s <sup>-1/2</sup> ) | D <sub>Li+</sub><br>(cm <sup>2</sup> s <sup>-1</sup> ) | ZnO-<br>NCNF-700  | R <sub>SEI</sub><br>(Ω) | R <sub>ct</sub><br>(Ω) | σ <sub>ω</sub><br>(Ω cm <sup>2</sup> s <sup>-1/2</sup> ) | D <sub>Li+</sub><br>(cm <sup>2</sup> s <sup>-1</sup> ) |
|-------------------|-------------------------|------------------------|----------------------------------------------------------|--------------------------------------------------------|-------------------|-------------------------|------------------------|----------------------------------------------------------|--------------------------------------------------------|
| 1 <sup>st</sup>   | 324.5                   | 780.5                  | 904.6                                                    | 2.9×10 <sup>-14</sup>                                  | 1 <sup>st</sup>   | 131.6                   | 127.7                  | 187.0                                                    | 6.8×10 <sup>-13</sup>                                  |
| 5 <sup>th</sup>   | 348.9                   | 1838                   | 1294.4                                                   | 1.4×10 <sup>-14</sup>                                  | 5 <sup>th</sup>   | 138.8                   | 198.6                  | 214.6                                                    | 5.2×10 <sup>-13</sup>                                  |
| 50 <sup>th</sup>  | 331.8                   | 1273                   | 1473.5                                                   | 1.1×10 <sup>-14</sup>                                  | 50 <sup>th</sup>  | 129.0                   | 232.4                  | 197.7                                                    | 6.1×10 <sup>-13</sup>                                  |
| 200 <sup>th</sup> | 401.2                   | 6022                   | 2157.6                                                   | 5.0×10 <sup>-15</sup>                                  | 200 <sup>th</sup> | 88.1                    | 67.6                   | 74.7                                                     | 4.3×10 <sup>-12</sup>                                  |
| 500 <sup>th</sup> | 572.9                   | 16220                  | 3404.8                                                   | 2.1×10 <sup>-15</sup>                                  | 500 <sup>th</sup> | 78.2                    | 61.4                   | 58.4                                                     | 7.1×10 <sup>-12</sup>                                  |

**Table S4.** Comparison of discharge capacity retention for full cell in this work with other reported previously.

| Battery systems                                                                            | Coulombic efficiency (%)         | Discharge retention (%)               | Reference |
|--------------------------------------------------------------------------------------------|----------------------------------|---------------------------------------|-----------|
| ZnO-NCNF~<br>LiNi <sub>0.8</sub> Co <sub>0.1</sub> Mn <sub>0.1</sub> O <sub>2</sub>        | 55.6% at 100 mA g <sup>-1</sup>  | 99% at 60 <sup>th</sup> cycle         | This work |
| NiCr <sub>2</sub> O <sub>4</sub> /NG~LiFePO <sub>4</sub>                                   | -                                | 37.2% at the 50 <sup>th</sup> cycle   | 20        |
| Zn <sub>3</sub> V <sub>2</sub> O <sub>8</sub> ~LiFePO <sub>4</sub>                         | With prelithiation               | 80% at the 100 <sup>th</sup> cycle    | 21        |
| PEDOT-PSS/ZnO/C~<br>LiNi <sub>0.6</sub> Co <sub>0.2</sub> Mn <sub>0.2</sub> O <sub>2</sub> | With prelithiation               | ~66.4% at the 30 <sup>th</sup> cycle  | 13        |
| ZnFe <sub>2</sub> O <sub>4</sub> /G~LiFePO <sub>4</sub> /C                                 | ~40.3% at 100 mA g <sup>-1</sup> | ~55.9% at the 10 <sup>th</sup> cycle  | 22        |
| ZnO@OMIL~LiFePO <sub>4</sub>                                                               | 85.4% at 1C rate                 | 87.5% at the 100 <sup>th</sup> cycle  | 14        |
| $\alpha$ -Fe <sub>2</sub> O <sub>3</sub> ~LiFePO <sub>4</sub>                              | ~68.5% at 1/20 C rate            | ~75% at the 30 <sup>th</sup> cycle    | 23        |
| CuO@MnO <sub>2</sub> ~LiCoO <sub>2</sub>                                                   | ~65% at 150 mA g <sup>-1</sup>   | ~81.4% at the 100 <sup>th</sup> cycle | 24        |

## References

- 1 J. Liu, Y. Li, R. Ding, J. Jiang, Y. Hu, X. Ji, Q. Chi, Z. Zhu and X. Huang, *J. Phys. Chem. C*, 2009, **113**, 5336-5339.
- 2 X. Shen, D. Mu, S. Chen, B. Wu and F. Wu, *ACS Appl. Mater. Interfaces*, 2013, **5**, 3118-3125.
- 3 C. Xiao, S. Zhang, S. Wang, Y. Xing, R. Lin, X. Wei and W. Wang, *Electrochim. Acta*, 2016, **189**, 245-251.
- 4 S. Lu, H. Wang, J. Zhou, X. Wu and W. Qin, *Nanoscale*, 2017, **9**, 1184-1192.
- 5 F. Sun, J. Gao, H. Wu, X. Liu, L. Wang, X. Pi and Y. Lu, *Carbon*, 2017, **113**, 46-54.
- 6 H.-S. Kim, H. Seo, K. Kim, J. Lee and J.-H. Kim, *Ceram. Int.*, 2018, **44**, 18222-18226.
- 7 E. Samuel, B. Joshi, M.-W. Kim, Y.-I. Kim, S. Park, T.-G. Kim, M. T. Swihart, W. Y. Yoon and S. S. Yoon, *J. Power Sources*, 2018, **395**, 349-357.
- 8 G. Zhang, S. Hou, H. Zhang, W. Zeng, F. Yan, C. C. Li and H. Duan, *Adv. Mater.*, 2015, **27**, 2400-2405.
- 9 Y. Zhao, G. Huang, Y. Li, R. Edy, P. Gao, H. Tang, Z. Bao and Y. Mei, *J. Mater. Chem. A*, 2018, **6**, 7227-7235.
- 10 Y. Hao, S. Wang, J. Zeng, H. Li, P. Yang, B. Liu, S. Zhang and Y. Xing, *Ceram. Int.*, 2018, **44**, 1321-1327.
- 11 F. Yin, Z. Zhang, Y. Zhang, C. Zhang and L. Xu, *Electrochim. Acta*, 2018, **270**, 274-283.
- 12 E. Quartarone, V. Dall'Asta, A. Resmini, C. Tealdi, I. G. Tredici, U. A. Tamburini and P. Mustarelli, *J. Power Sources*, 2016, **320**, 314-321.
- 13 G.-L. Xu, Y. Li, T. Ma, Y. Ren, H.-H. Wang, L. Wang, J. Wen, D. Miller, K. Amine and Z. Chen, *Nano Energy*, 2015, **18**, 253-264.
- 14 H. Song, J. Su and C. Wang, *Adv. Energy Mater.*, 2019, **9**, 1900426.
- 15 Z. Tu, G. Yang, H. Song and C. Wang, *ACS Appl. Mater. Interfaces*, 2017, **9**, 439-446.
- 16 X. Sun, C. Zhou, M. Xie, H. Sun, T. Hu, F. Lu, S. M. Scott, S. M. George and J. Lian, *J. Mater. Chem. A*, 2014, **2**, 7319-7326.
- 17 J. F. S. Fernando, C. Zhang, Konstantin L. Firestein, J. Y. Nerkar and D. V. Golberg, *J. Mater. Chem. A*, 2019, **7**, 8460-8471.

- 18 N. Li, S. X. Jin, Q. Y. Liao and C. X. Wang, *ACS Appl. Mater. Interfaces*, 2014, **6**, 20590-20596.
- 19 X. Shen, D. Mu, S. Chen, R. Huang and F. Wu, *J. Mater. Chem. A*, 2014, **2**, 4309-4315.
- 20 J. Tang, S. Ni, Q. Chen, X. Yang and L. Zhang, *J. Alloys Compd.*, 2017, **698**, 121-127.
- 21 Z. Yin, J. Qin, W. Wang and M. Cao, *Nano Energy*, 2017, **31**, 367-376.
- 22 A. Varzi, D. Bresser, J. von Zamory, F. Muller and S. Passerini, *Adv. Energy Mater.*, 2014, **4**, 1400054.
- 23 P. S. Veluri, A. Shaligram and S. Mitra, *J. Power Sources*, 2015, **293**, 213-220.
- 24 Q. Chen, B. Heng, H. Wang, D. Sun, B. Wang, M. Sun, S. Guan, R. Fu and Y. Tang, *J. Alloys Compd.*, 2015, **641**, 80-86.
